# Supplementary material for: Recycling expired pharmaceutical drugs as redox materials for efficient and sustainable flexible supercapacitors
Source: Royal Society of Chemistry journal article supplement (doi:10.1039/d3nj00497j), 2023-01-01
Supplement: d3nj00497j1.pdf [file d3nj00497j1.pdf]

## Supporting Information

### Recycling expired pharmaceutical drugs as redox materials for efficient and sustainable flexible supercapacitors

L. Ojeda, J. Oliva, A.I Oliva and C. R. Garcia

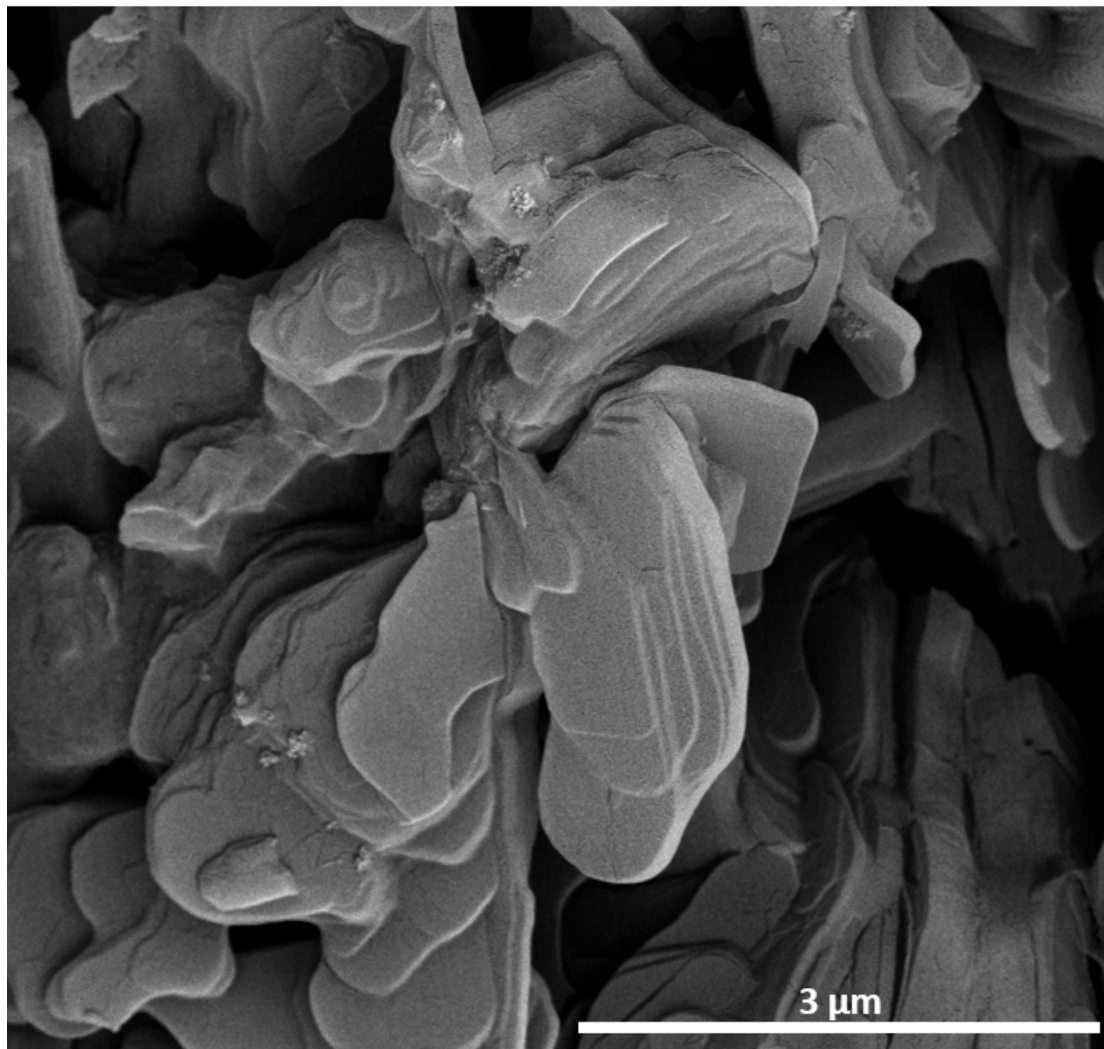

**Figure S1.** A closer SEM image of the DICLO powder employed in this work

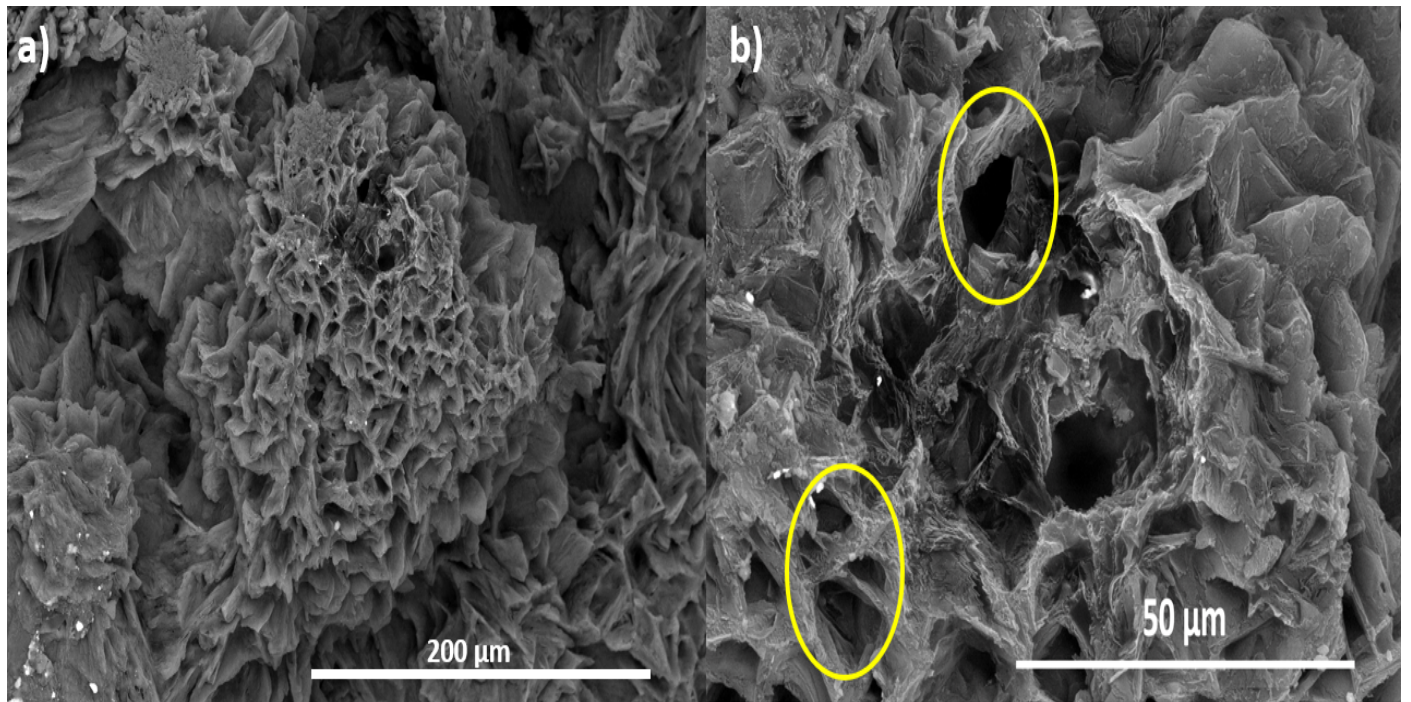

**Figure S2.** SEM images for the IBU powder at higher magnifications

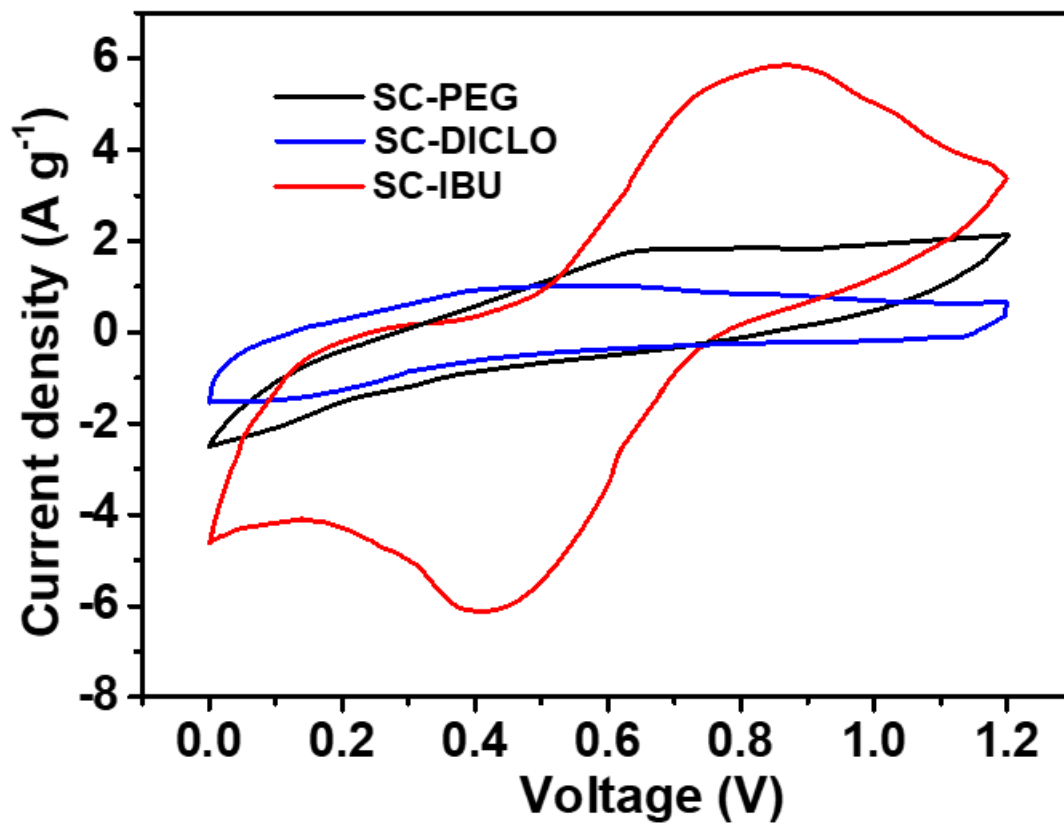

**Figure S3.** Comparison of the CV plots for the SC-PEG, SC-DICLO and SC-IBU devices.

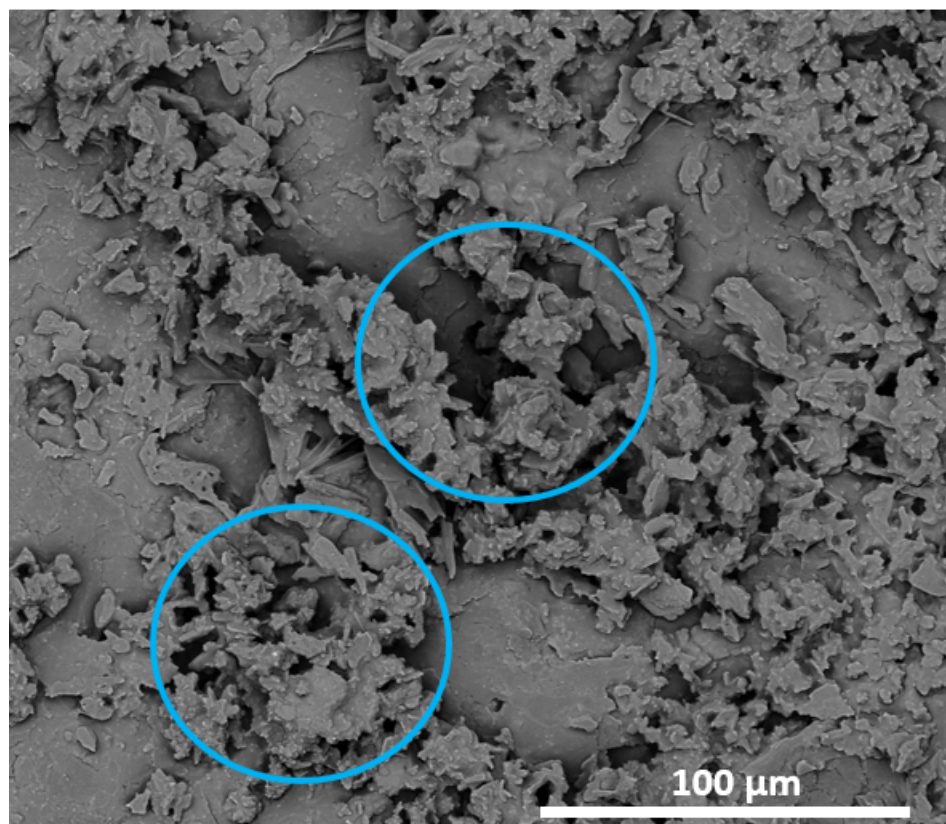

**Figure S4.** SEM images of DICLO powder embedded on the graphene layer.

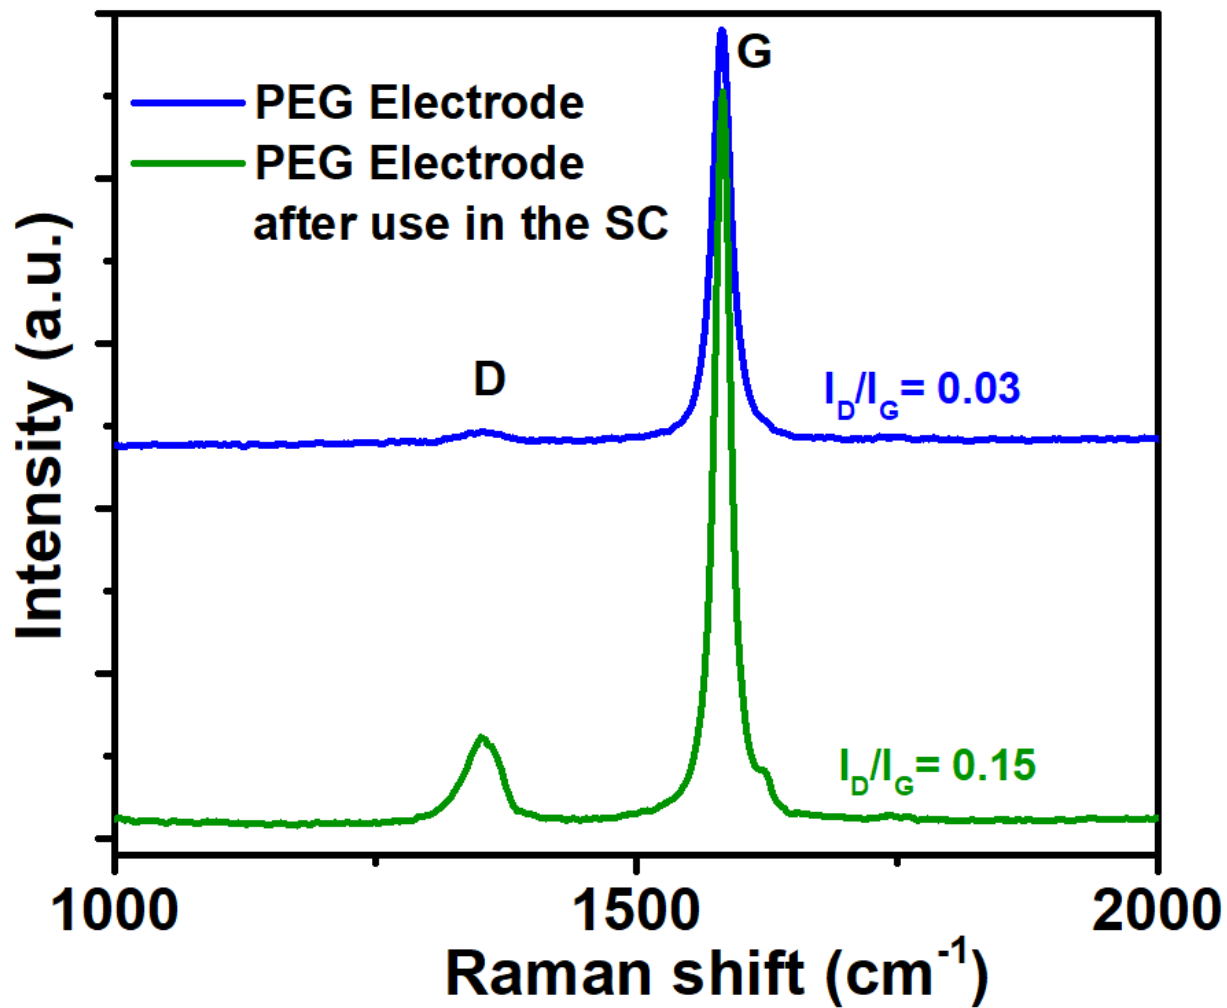

**Figure S5.** Raman spectra for the PEG electrode before and after its use in the SC-PEG device.

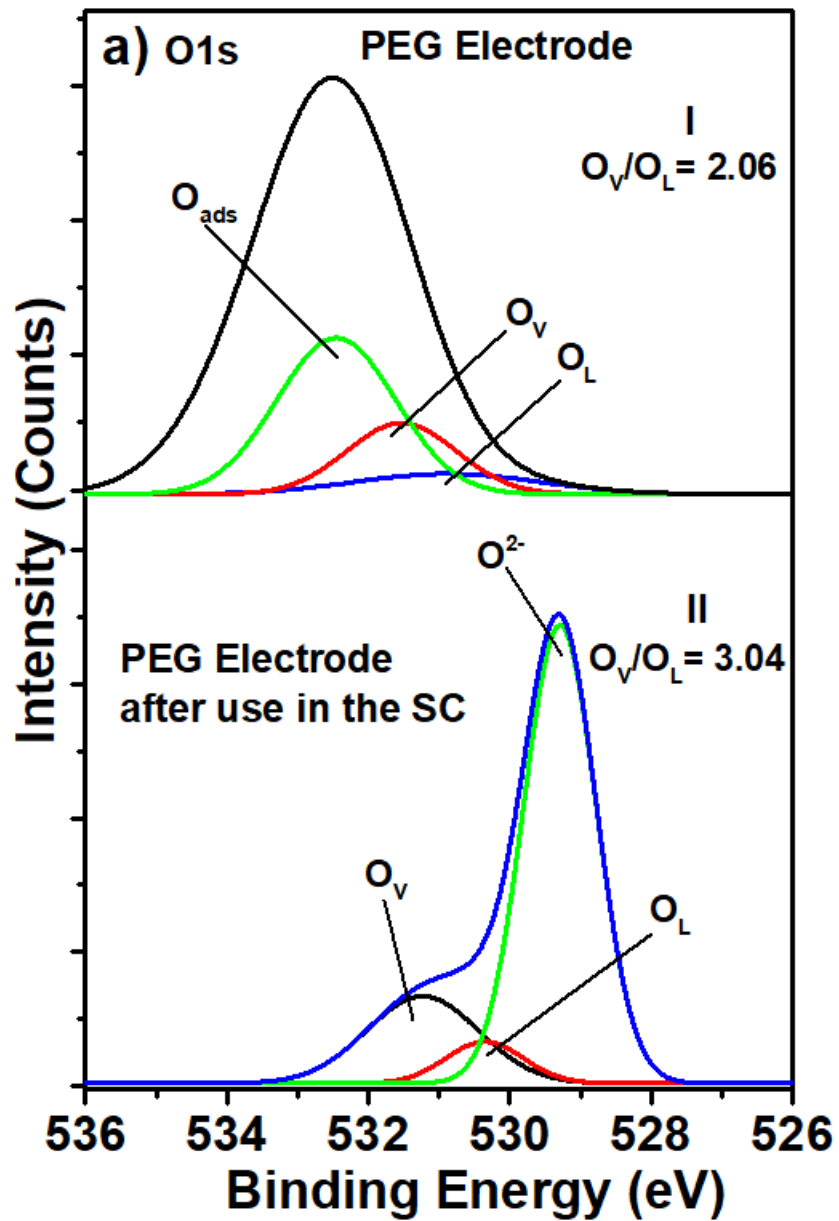

**Figure S6.** XPS spectra (O1s orbital) for the PEG electrode before and after its use in the SC-PEG device.

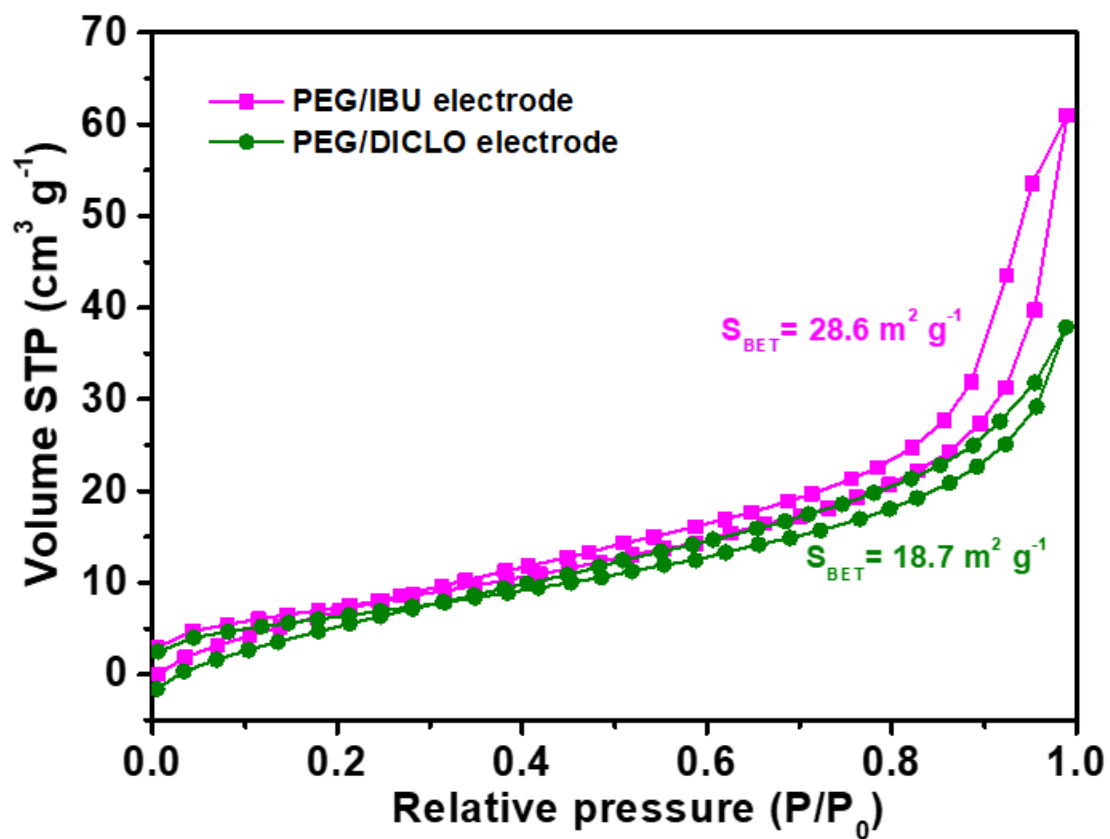

**Figure S7.** Nitrogen adsorption-desorption BET isotherms for the PEG/IBU and PEG/DICLO electrodes.
